# Supplementary material for: A monomolecularly imprinted dendrimer (MID) capable of selective binding with a tris(2-aminoethyl)amine guest through multiple functional group interactionsElectronic supplementary information (ESI) available: compound characterization data and representative UV-visible binding data with Kassoc plots. See http://www.rsc.org/suppdata/cc/b3/b316248f/
Source: Royal Society of Chemistry journal article supplement (doi:10.1039/b316248f), 2004-01-01
Supplement: b316248f.pdf [file b316248f.pdf]

## Supporting Information

---

### A Monomolecularly Imprinted Dendrimer (MID) Capable of Selective Binding with a Tris(2-aminoethyl)amine Guest Through Multiple Functional Group Interactions<sup>†</sup>

James B. Beil and Steven C. Zimmerman\*

Department of Chemistry, 600 S. Mathews Street, University of Illinois at Urbana-Champaign, Urbana, IL 61801, USA. Fax: +1 217 244 9919; Tel: +1 217 333 6655; E-mail: sczimmer@uiuc.edu

#### Characterization Data for Key Compounds:

**9:** <sup>1</sup>H NMR (CDCl<sub>3</sub>) δ 7.7 (s, 1H), 7.2 (broad m, 6H), 6.1-7.1 (broad m, 90 H), 5.4-5.8 (broad m, 32H), 4.5-5.2 (broad m, 48H), 3.7-4.2 (broad s, 64H), 2.1-2.6 (broad s, 64 H); <sup>19</sup>F NMR (TFA internal standard) δ -71.3; MS (MALDI-TOF) 16/16 cross-links calcd. M+Na<sup>+</sup> = 5219, found M+Na<sup>+</sup> = 5216, calcd. M+K<sup>+</sup> = 5235, found M+K<sup>+</sup> = 5230, 15/16 cross-links calcd. M+Na<sup>+</sup> = 5247, found M+Na<sup>+</sup> = 5247; MW<sub>PS</sub> = 3000.

**9-CO<sub>2</sub>Me:** <sup>1</sup>H NMR (CDCl<sub>3</sub>) δ 7.7 (s, 1H), 7.2 (broad m, 6H), 6.1-7.1 (broad m, 90 H), 5.4-5.8 (broad m, 32H), 4.5-5.2 (broad m, 48H), 3.7-4.2 (broad s, 64H), 2.1-2.6 (broad s, 64 H); <sup>19</sup>F NMR (TFA internal standard) δ -70.4; MS (MALDI-TOF) 16/16 cross-links calcd. M+Na<sup>+</sup> = 5247, found M+Na<sup>+</sup> = 5250, calcd. M+K<sup>+</sup> = 5263, found M+K<sup>+</sup> = 5266, 15/16 cross-links calcd. M+Na<sup>+</sup> = 5275, found M+Na<sup>+</sup> = 5279; MW<sub>PS</sub> = 3200.

**14:** <sup>1</sup>H NMR (CDCl<sub>3</sub>) δ 7.7 (s, 1H), 7.2 (broad m, 6H), 6.1-7.1 (broad m, 90 H), 5.4-5.8 (broad m, 32H), 4.5-5.2 (broad m, 48H), 3.7-4.2 (broad s, 64H), 2.1-2.6 (broad s, 64 H); <sup>19</sup>F NMR (TFA internal standard) δ -71.4; MS (MALDI-TOF) 16/16 cross-links calcd. M+H<sup>+</sup> = 5196, found M+H<sup>+</sup> = 5199, calcd. M+Na<sup>+</sup> = 5219, found M+Na<sup>+</sup> = 5222, calcd. M+K<sup>+</sup> = 5235, found M+K<sup>+</sup> = 5243.

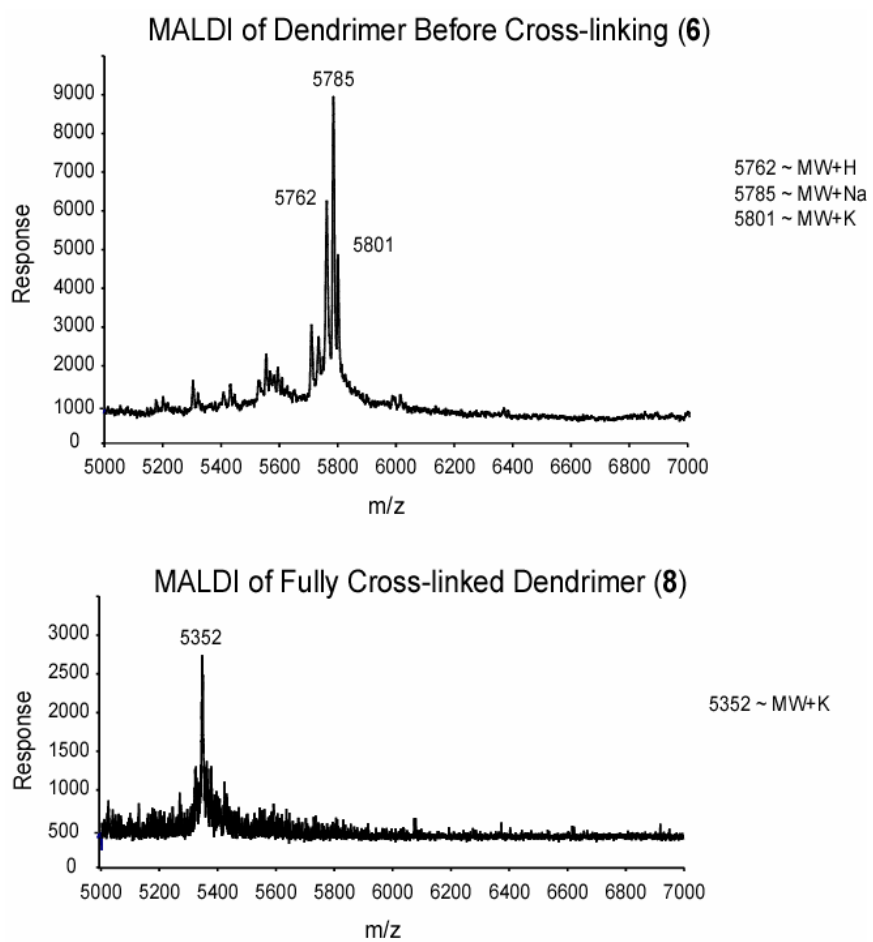

**Fig. S1.** Representative MALDI-TOF spectra of **6** and **8**.

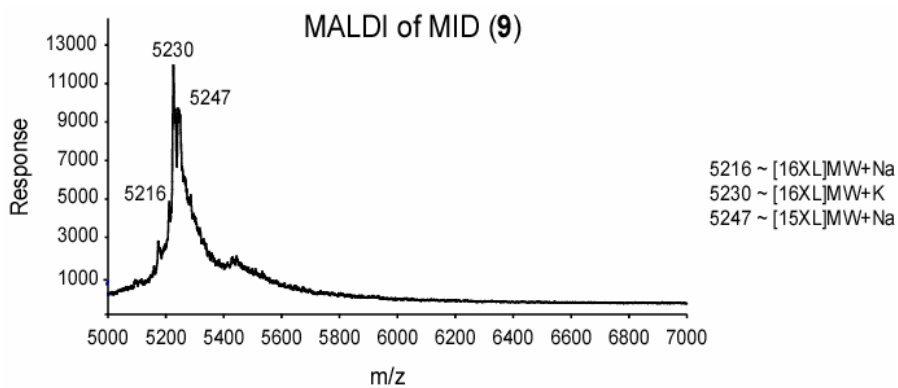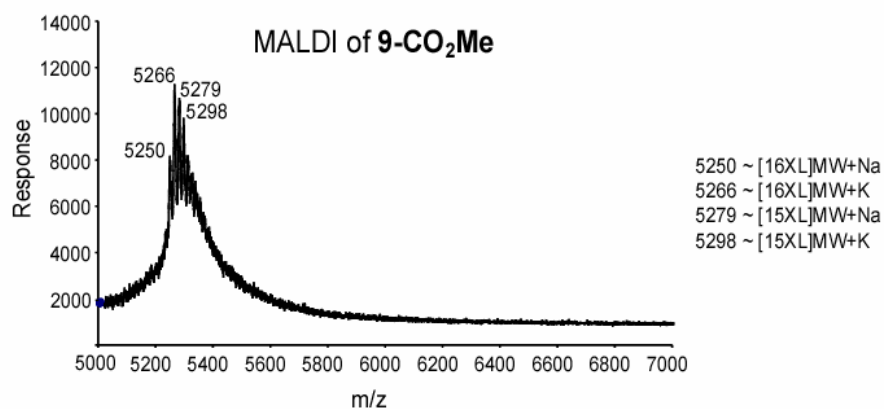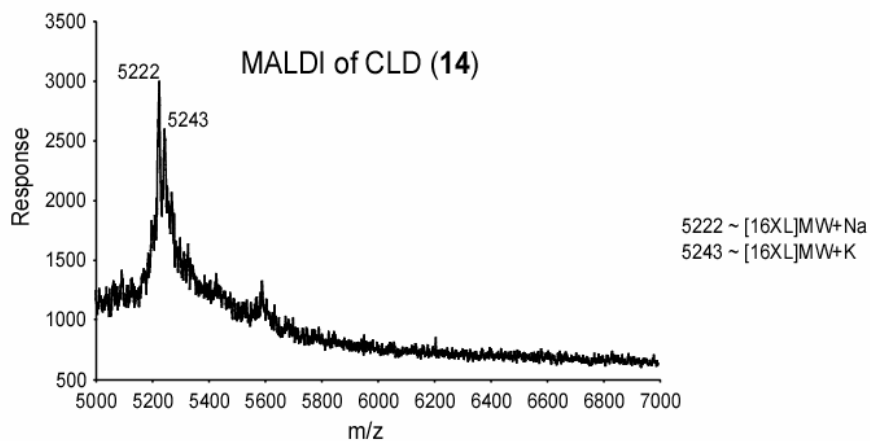

**Fig. S2.** Representative MALDI-TOF spectra of **9**, **9-CO<sub>2</sub>Me**, and **14**.

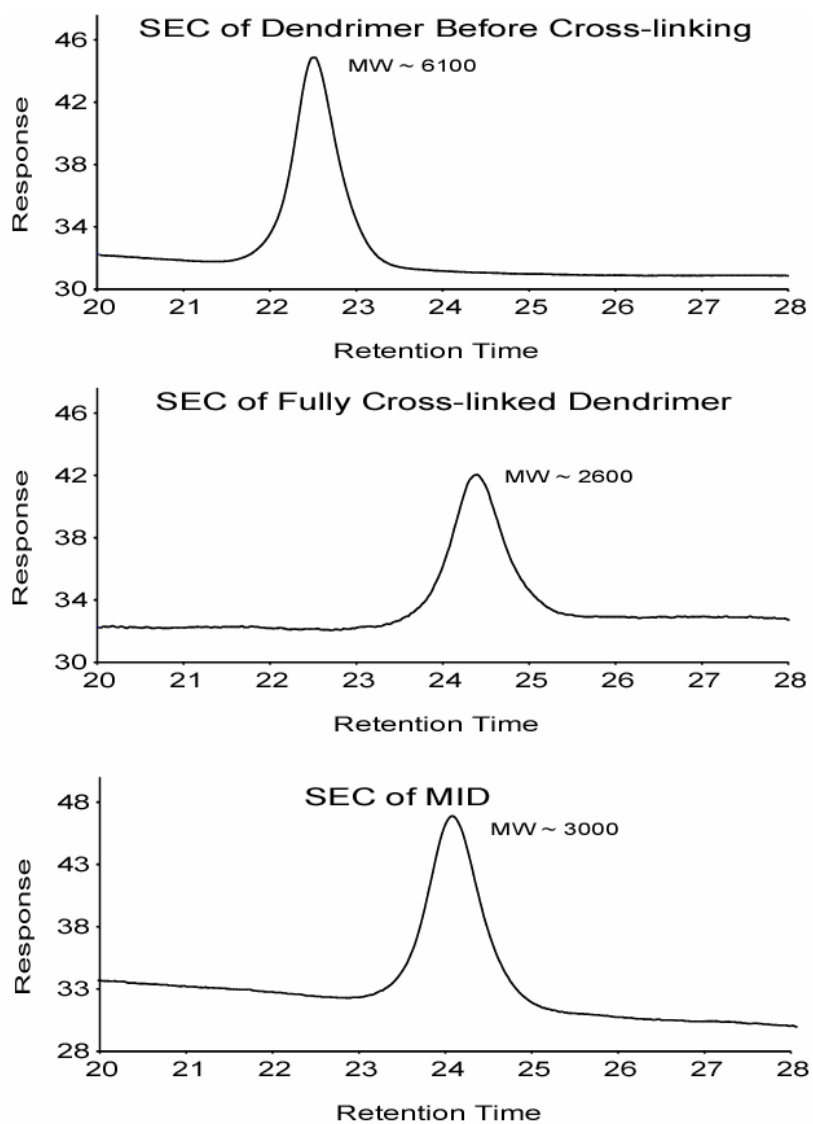

**Fig. S3.** SEC chromatograms for dendrimers 6, 8, and 9

A.

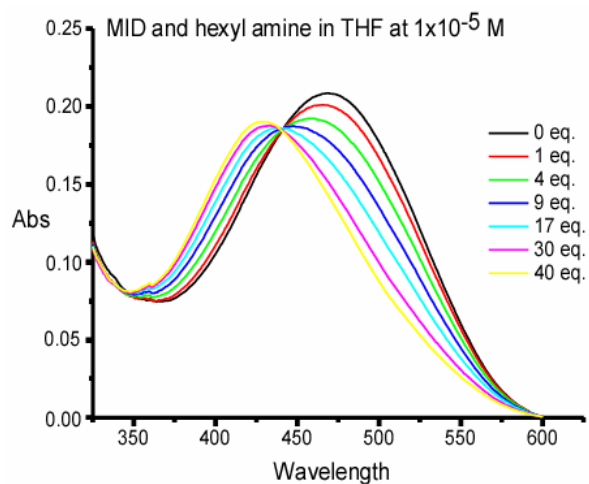

B.

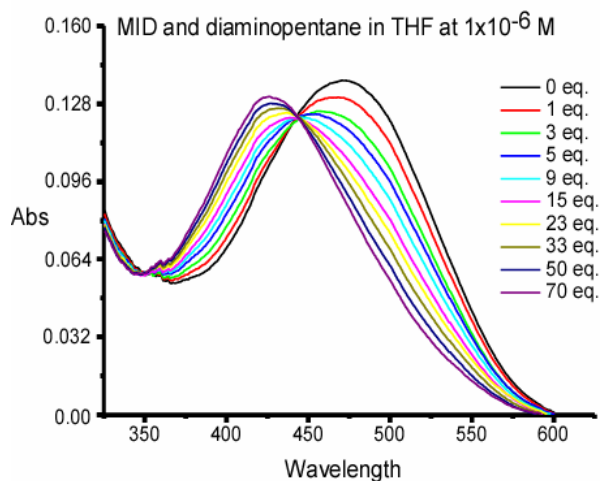

C.

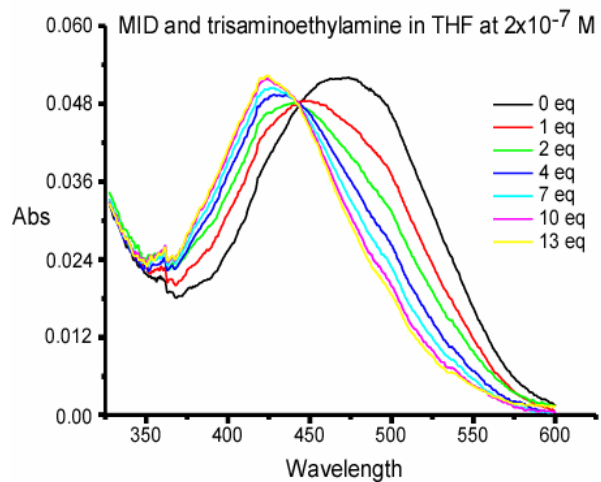

**Fig. S4.** UV titration curves for MID (**9**) with guests **15** (A), **16** (B), and **4** (C).

A.

Binding Curve for MID with hexylamine at  $1 \times 10^{-5}$  M

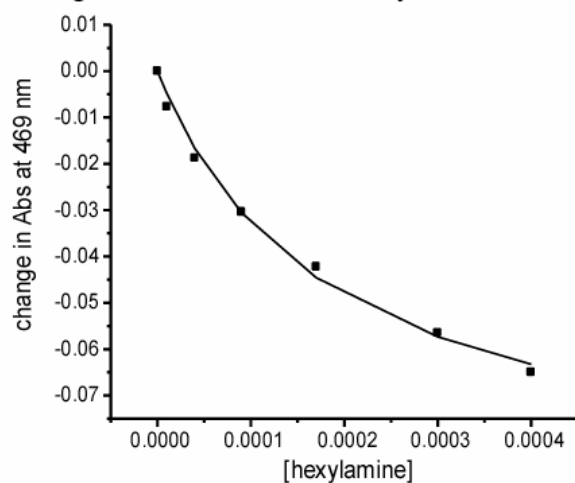

B.

Binding Curve for MID with diaminopentane at  $1 \times 10^{-5}$  M

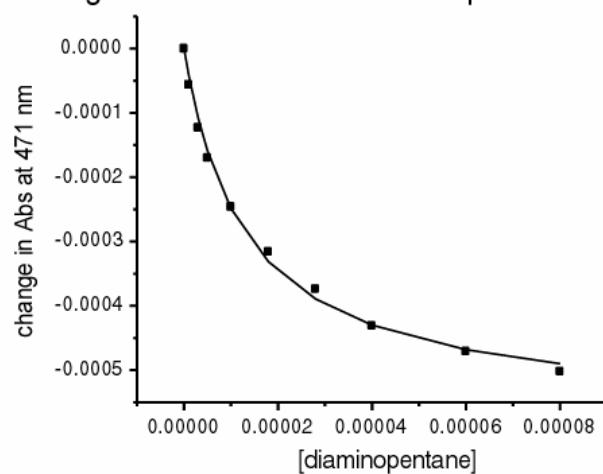

C.

Binding Curve for MID with trisaminoethylamine at  $1 \times 10^{-5}$  M

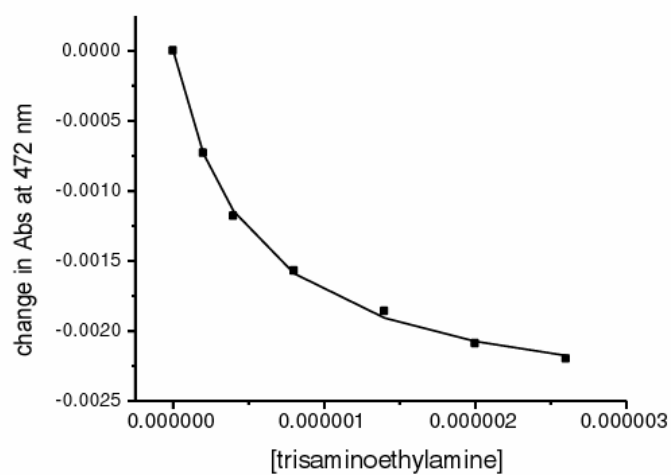

**Fig. S5.** Binding curves for MID (**9**) with guests **15** (A), **16** (B), and **4** (C).

**Table S1.**  $K_{\text{assoc}}$  values for **9**, **9-CO<sub>2</sub>Me**, and **14** with simple amine guests<sup>a</sup>

| Guest                                                           | $K_{\text{assoc}}$ (M <sup>-1</sup> ) |                             |                             |
|-----------------------------------------------------------------|---------------------------------------|-----------------------------|-----------------------------|
|                                                                 | <b>9-CO<sub>2</sub>Me</b>             | <b>14</b>                   | <b>9</b>                    |
| CH <sub>3</sub> (CH <sub>2</sub> ) <sub>5</sub> NH <sub>2</sub> | $(5.7 \pm 0.8) \times 10^3$           | N.D.                        | $(4.5 \pm 1.9) \times 10^3$ |
| H <sub>2</sub> N(CH <sub>2</sub> ) <sub>5</sub> NH <sub>2</sub> | $(1.1 \pm 0.4) \times 10^4$           | $(4.4 \pm 0.8) \times 10^4$ | $(2.0 \pm 0.7) \times 10^5$ |
| <b>4</b>                                                        | $(1.1 \pm 0.3) \times 10^5$           | $(8.0 \pm 3.1) \times 10^5$ | $(3.3 \pm 1.1) \times 10^6$ |

<sup>a</sup> Measured in THF at 298 °C. N.D.: Not determined.**Table S2.**  $\Delta G_{298}^\circ$  values for **9**, **9-CO<sub>2</sub>Me**, and **14** with simple amine guests<sup>a</sup>

| Guest                                                           | $K_{\text{assoc}}$ (M <sup>-1</sup> ) |           |          |
|-----------------------------------------------------------------|---------------------------------------|-----------|----------|
|                                                                 | <b>9-CO<sub>2</sub>Me</b>             | <b>14</b> | <b>9</b> |
| CH <sub>3</sub> (CH <sub>2</sub> ) <sub>5</sub> NH <sub>2</sub> | 5.1                                   | N.D.      | 5.0      |
| H <sub>2</sub> N(CH <sub>2</sub> ) <sub>5</sub> NH <sub>2</sub> | 5.5                                   | 6.3       | 7.2      |
| <b>4</b>                                                        | 6.9                                   | 8.1       | 8.9      |

<sup>a</sup> Measured in THF at 298 °C. N.D.: Not determined.
